# Supplementary material for: Circularly polarised luminescent inks with low crosstalk and high efficiency for 3D information encoding from liquid crystal microcapsules
Source: Royal Society of Chemistry journal article supplement (doi:10.1039/d5tc04178c), 2025-12-23
Supplement: d5tc04178c1.pdf [file d5tc04178c1.pdf]

1 *Supplemental Information for*

2 **Circularly Polarised Luminescent Inks with Low Crosstalk and High**  
3 **Efficiency for 3D Information Encoding from Liquid Crystal**  
4 **Microcapsules**

5 Shenghao Hua<sup>†a</sup>, Xiaojuan Wu<sup>†b</sup>, Haixiao Yang<sup>c</sup>, Yu Liu<sup>a</sup>, Yinjie Chen<sup>\*a</sup>, Yajun  
6 Zhang<sup>\*c</sup>, Haifeng Yu<sup>\*d</sup> and Quan Li<sup>\*e</sup>

7 <sup>a</sup>Beijing Engineering Research Centre of Printed Electronics  
8 Beijing Institute of Graphic Communication, Beijing, China  
9 E-mail: [chenyinjie@bigc.edu.cn](mailto:chenyinjie@bigc.edu.cn)

10

11 <sup>b</sup>Technology Innovation and Management Department  
12 Beijing BOE Optoelectronics Technology CO., LTD.

13

14 <sup>c</sup>College of Mechanical and Electrical Engineering  
15 Beijing University of Chemical Technology, Beijing, China  
16 E-mail: [zhyj@mail.buct.edu.cn](mailto:zhyj@mail.buct.edu.cn)

17

18 <sup>d</sup> School of Materials Science and Engineering, and Key Laboratory of Polymer Chemistry and  
19 Physics of Ministry of Education, Peking University, Beijing, China.  
20 E-mail: [yuhaifeng@pku.edu.cn](mailto:yuhaifeng@pku.edu.cn)

21

22 <sup>e</sup> Institute of Advanced Materials & School of Chemistry and Chemical Engineering  
23 Southeast University, Nanjing, China.  
24 E-mail: [quanli3273@gmail.com](mailto:quanli3273@gmail.com)

25

## 26 Contents

27

### 28 Experimental Section/Methods

29 **Figure S1.** Materials and Molecular Formulas.

30 **Figure S2.** DSC Profile of R6G-CLCMs.

31 **Figure S3.** TG/DTG Profile of R6G-CLCMs.

32 **Figure S4.** FTIR spectra of R6G-CLCMs.

33 **Figure S5.** EDS Spectrum of R6G-CLCMs.

34 **Figure S6.** Observation of a single R6G-CLCM under an optical microscope during mechanical  
35 compression.

36 **Figure S7.** Photographs of R6G and R6G-CLCMs aqueous dispersions.

37 **Figure S8.** Polarised/dark-field images and size distribution of R6G-CLCMs at different R6G  
38 concentrations.

39 **Figure S9.** Daylight/UV images of mould-cast “orange” pattern highlighting the coffee-ring effect.

40 **Figure S10.** Environmental compatibility tests of R6G-CLCMs.

41 **Figure S11.** Visible-region emission of R6G-CLCMs probed under varied excitation wavelengths.

42 **Figure S12.** Cryo-SEM images of R6G-CLCMs synthesised with different MMA contents.

43 **Figure S13.** Morphology of R6G-CLCMs and cross-sections of films prepared under different conditions.

44 **Figure S14.** Optical properties of R6G-CLCMs with different shell thicknesses (reflectance &  
45 fluorescence).

46 **Figure S15.** Fluorescence peak trends of thick- and thin-shell R6G-CLCMs at varying dye concentrations.

47 **Figure S16.** Reflectance and fluorescence of blade-coated R6G-CLCMs films at higher R6G loadings.

48 **Figure S17.** Angle-dependent optical/fluorescence responses of mould-cast films with different R6G-  
49 CLCMs concentrations.

50 **Figure S18.** Polarized optical microscopy (POM) images of dye-free cholesteric liquid crystal  
51 microcapsules (CLCMs).

52 **Figure S19.** Daylight/UV polarised images of a single-ink R6G-CLCMs QR code on a black substrate.

53 **Figure S20.** Angle-dependent images of a single-ink R6G-CLCMs QR code showing green-to-pink colour  
54 shift.

55

56

57

58

59

## 60 **Experimental Section/Methods**

### 61 **Materials**

62 The nematic liquid crystal HNG-720600 (Nanjing Ningcui Optical Technology Co., Ltd., Nanjing, China;  
63  $n_e=1.574$ ,  $n_o=1.477$ ,  $T_{NI}=100^{\circ}\text{C}$ ) and the left-handed chiral dopant S5011 (Jiangsu Hecheng Display  
64 Technology Co., Ltd., Nanjing, China;  $\text{HTP} = 104\ \mu\text{m}^{-1}$ ) were purchased commercially. The fluorescent dye  
65 Rhodamine 6G, dichloromethane, PVA 1788, and methyl methacrylate (MMA) were purchased from  
66 Shanghai Macklin Biochemical Co., Ltd. (Shanghai, China). Azobis(isoheptanenitrile) (ABVN) was obtained  
67 from Shanghai Aladdin Biochemical Technology Co., Ltd. (Shanghai, China). All chemicals were used as  
68 received without further purification.

### 69 **Preparation of Rhodamine 6G (R6G)-doped Cholesteric Liquid Crystals**

70 The nematic liquid crystal was initially blended with the left-handed chiral dopant S5011 to form the CLC  
71 matrix, using dichloromethane as a co-solvent to facilitate the mixing process. To obtain CLCs exhibiting  
72 Bragg reflections at red (638 nm), green (554 nm), and blue (470 nm) wavelengths, the S5011  
73 concentrations were adjusted to 2.25 wt%, 2.68 wt%, and 3.2 wt%, respectively. The mixtures were  
74 magnetically stirred at  $100^{\circ}\text{C}$  (the clearing point) for 2h to ensure homogeneity. Subsequently, the pre-  
75 prepared CLCs were doped with R6G and further dissolved in dichloromethane. The resulting mixture was  
76 sonicated to promote uniform dye dispersion, followed by stirring at  $105^{\circ}\text{C}$  (above the clearing point) for  
77 1 h. This process yielded a homogeneous R6G-CLC system in which both the CLC matrix and the R6G dye  
78 were fully dissolved.

### 79 **Preparation of R6G-Doped Cholesteric Liquid Crystal Microcapsules (R6G-CLCMs)**

80 R6G-CLCMs were synthesised via an interfacial polymerisation. First, the R6G-CLC was thoroughly blended  
81 with methyl methacrylate (MMA) and the radical initiator ABVN. The resulting organic phase was then  
82 added dropwise at 0.5 mL/min into 60 mL of a 6 wt% aqueous PVA solution, whilst maintaining a constant  
83 temperature of  $60^{\circ}\text{C}$  and stirring at 1400 rpm using a magnetic stirrer equipped with an olive-shaped PTFE  
84 stirring bar (Hunan Beekman Biotechnology Co., Ltd., Changsha, China). This procedure generated a stable  
85 oil-in-water (O/W) emulsion, in which the organic droplets containing the liquid crystal core and monomer  
86 were uniformly dispersed in the aqueous continuous phase. After 50 minutes of continuous stirring, the  
87 emulsion temperature was raised to  $80^{\circ}\text{C}$  and held for a further 5 h to complete the free-radical  
88 polymerisation of MMA, yielding a robust PMMA shell encapsulating each microcapsule. The resulting  
89 suspension was allowed to stand, centrifuged, and washed twice with deionised water. A final concentrated  
90 dispersion of R6G-CLCMs was collected for subsequent use. For the preparation of dye-free cholesteric

91 liquid crystal microcapsules (CLCMs), the same procedure was applied, substituting the R6G-CLC with  
92 undoped CLC under identical conditions.

### 93 **Preparation of Water-based R6G-CLCM Inks**

94 The obtained R6G-CLCMs were dispersed in a 15 wt% PVA solution at a microcapsule-to-PVA weight ratio  
95 of 1:1.5 for mould casting and blade coating, or 1:1 for dispensing applications. To suppress coffee-ring  
96 effects and improve ink homogeneity, 0.01 wt% Silok 120 was added, and the mixture was homogenised  
97 using a vortex mixer, yielding a stable and well-dispersed water-based ink.

### 98 **Characterisations**

99 The microscopic textures and optical alignment of the samples were examined using a polarized optical  
100 microscopy (POM; DM2500, Leica Microsystems, Wetzlar, Germany). UV-vis diffuse reflectance spectra  
101 were recorded with a UV-vis-NIR spectrophotometer (UH4150, Hitachi High-Technologies, Tokyo, Japan)  
102 equipped with an integrating sphere. Fluorescence emission spectra were measured using a fluorescence  
103 spectrophotometer (F-4700, Hitachi High-Technologies, Tokyo, Japan). The prepared dispersions and inks  
104 were homogenised using a vortex mixer (MX-S, DRAGONLAB Scientific Co., Ltd., Beijing, China). Film  
105 thicknesses were determined with a digital micrometer (3V, HEMUELE Instruments, Zhejiang, China). The  
106 surface morphology and microstructure of the microcapsules and films were characterised by scanning  
107 electron microscopy (SEM; GeminiSEM 300, ZEISS, Oberkochen, Germany). Elemental composition was  
108 analyzed by energy-dispersive X-ray spectroscopy (EDS; XPLORE30, Oxford Instruments, Oxford, UK). The  
109 shell thickness of the microcapsules was measured using cryogenic scanning electron microscopy (Cryo-  
110 SEM; Regulus 8220, Hitachi High-Tech, Japan). Circularly polarised luminescence (CPL) spectra and  
111 luminescence dissymmetry factors ( $g_{lum}$ ) were measured with a CPL spectrometer (CPL-300, JASCO  
112 Corporation, Tokyo, Japan). Fourier transform infrared (FTIR) spectra were collected using an FTIR  
113 spectrometer (Nicolet- iS20, Thermo Fisher Scientific, Waltham, MA, USA). Differential scanning calorimetry  
114 (DSC) were conducted on a DSC instrument (DSC25, TA Instruments, New Castle, DE, USA), and  
115 thermogravimetric analysis (TGA) were performed using a thermogravimetric analyser (TG 209 F3, Netzsch,  
116 Selb, Germany). Relative reflectance spectra were obtained with a fiber-optic spectrometer (AvaSpec-2048,  
117 Avantes, Apeldoorn, The Netherlands). A handheld spectrophotometer (Ci64, X-Rite Inc., Grand Rapids, MI,  
118 USA) was employed. Pattern engraving was performed using a laser engraving machine (3020, OSAI Laser,  
119 China). Photographs of samples and patterned films were captured with a digital camera ( $\alpha 7$  IV, Sony  
120 Corporation, Tokyo, Japan) equipped with an FE 24-105 mm F4 G OSS lens.



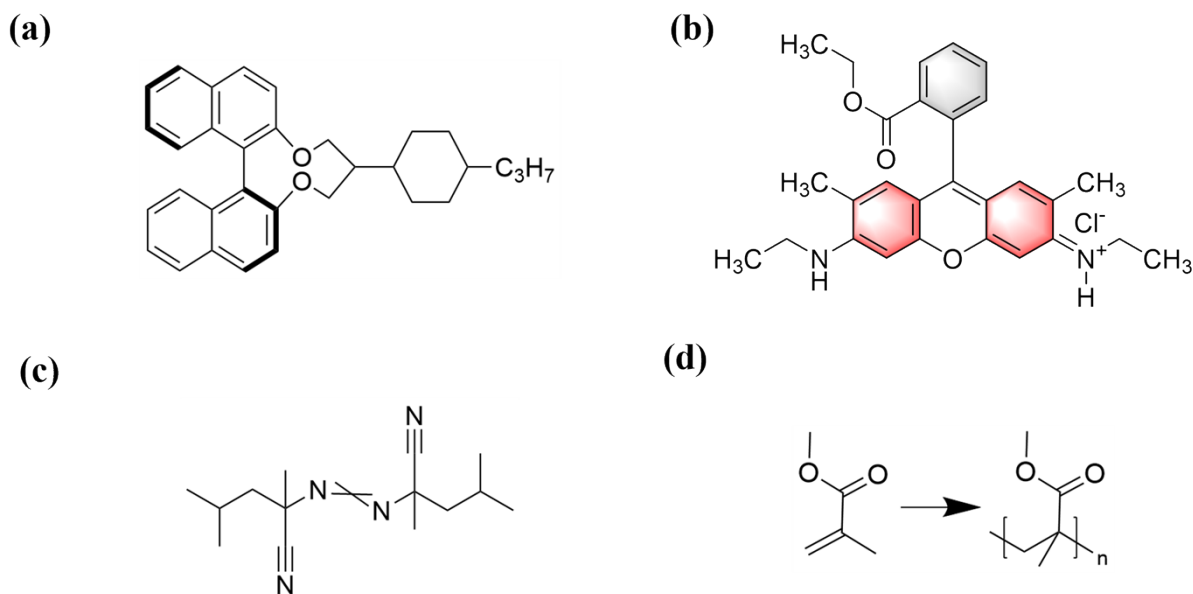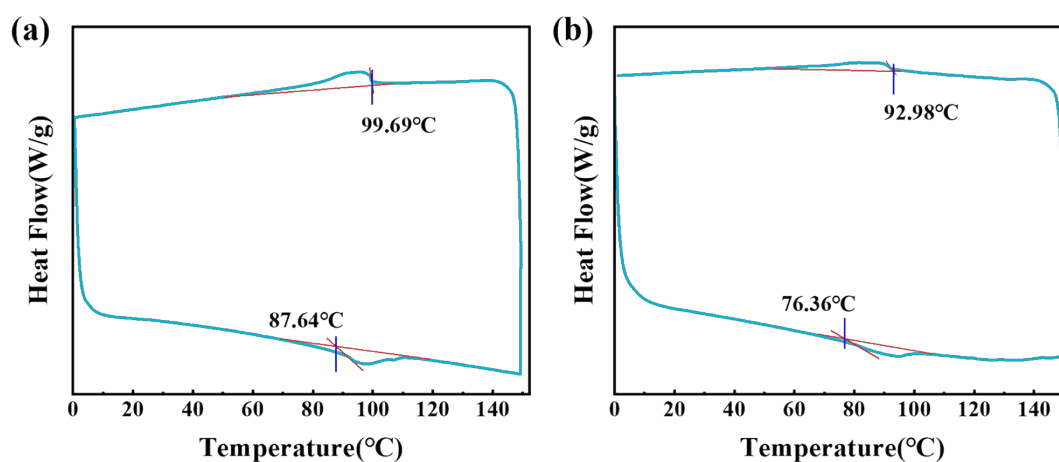

**Figure S2.** Differential scanning calorimetry (DSC) curves of CLC (a) and R6G-CLCMs (b).

The clearing point of the pure CLC sample was observed at 99.69 °C (a), whereas that of the R6G-CLCMs sample decreased to 92.38 °C (b). This reduction in transition temperature is attributed to the anchoring effect of the PMMA shell on the liquid crystal alignment and the disruption of the cholesteric helical structure by the incorporated R6G molecules.

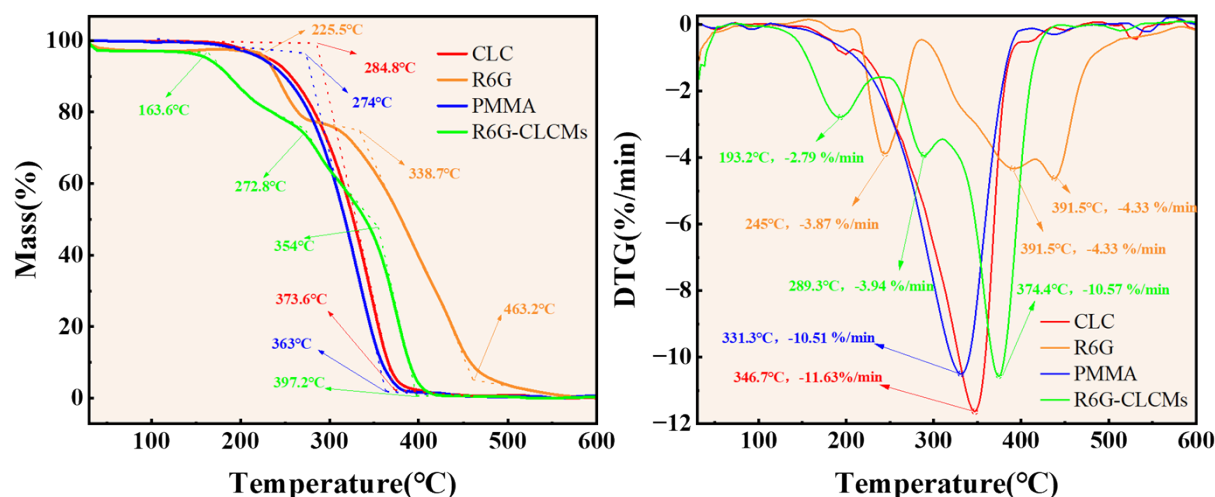

133

134 **Figure S3.** (a) TG and ( b) DTG curves of CLC, R6G, PMMA, and R6G-CLCMs.

135 The TG/DTG profiles of CLC, R6G, PMMA, and R6G-CLCMs exhibit a clear progressive  
 136 decomposition behaviour that reflects the intrinsic thermal characteristics of each component  
 137 and confirms successful microcapsule construction. The CLC shows a rapid, single-step  
 138 volatilization with negligible residue, typical of low-molecular-weight liquid crystal materials.  
 139 R6G undergoes multi-stage decomposition with substantial carbonaceous residue, consistent  
 140 with its highly conjugated aromatic structure. PMMA displays a single dominant degradation  
 141 event associated with chain-scission depolymerisation, leaving nearly no residue, as expected  
 142 for a pyrolytic polymer. In contrast, R6G-CLCMs present a broadened, multi-stage composite  
 143 decomposition profile: low-temperature weight loss originates from the liquid crystal core and  
 144 trace surface-bound dye, whilst higher-temperature mass loss corresponds to overlapping  
 145 degradation of the LC/R6G core and the PMMA shell. The increased final residue reflects the  
 146 contribution of thermally stable R6G. Collectively, the combined thermal signatures  
 147 demonstrate that the microcapsules integrate the decomposition characteristics of all  
 148 constituents and exhibit synergistic multi-component behaviour, confirming the successful  
 149 formation of the core-shell R6G-CLCM structure.

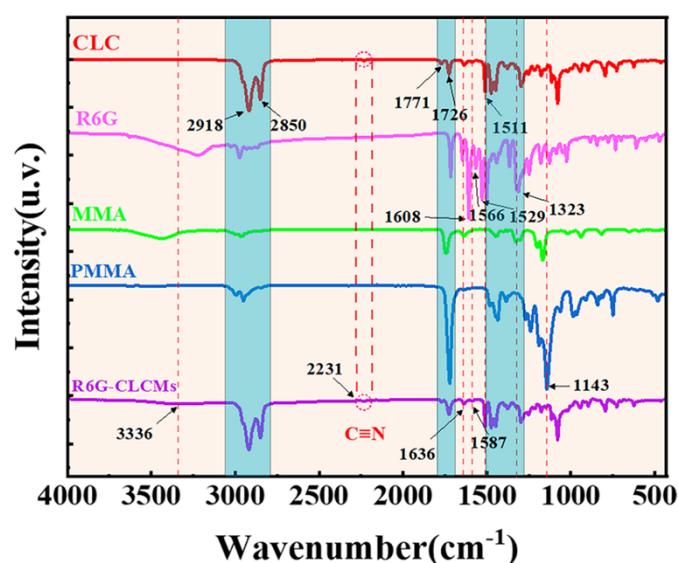

150

151 **Figure S4.** Fourier transform infrared (FTIR) spectra of R6G-CLCMs and their precursor  
 152 components, including CLC, Rhodamine 6G, methyl methacrylate (MMA), and poly (methyl  
 153 methacrylate) (PMMA).

154 The FTIR spectrum of the final R6G-CLCMs contains representative absorption features from  
 155 all major components. The cholesteric liquid crystal exhibits its characteristic aliphatic  
 156 stretching bands at 2918  $\text{cm}^{-1}$  and 2850  $\text{cm}^{-1}$ , together with the distinct  $\text{C}\equiv\text{N}$  stretching  
 157 vibration at 2231  $\text{cm}^{-1}$ , confirming that both the alkyl backbone and terminal cyano groups  
 158 remain intact after encapsulation. R6G preserves its molecular structure within the  
 159 microcapsules, as evidenced by the broad  $\text{OH}$  stretching band at 3336  $\text{cm}^{-1}$  from its carboxylic  
 160 acid group, the aromatic  $\text{C}=\text{C}$  stretching features in the 1500–1600  $\text{cm}^{-1}$  region, and the  
 161 coupled  $\text{C}-\text{N}$  /  $\text{C}-\text{O}$  vibration near 1323  $\text{cm}^{-1}$ . The MMA monomer shows a well-defined  $\text{C}=\text{C}$   
 162 stretching band at 1636  $\text{cm}^{-1}$ , which disappears in both PMMA and the R6G-CLCMs, confirming  
 163 complete polymerisation. A prominent  $\text{C}=\text{O}$  stretching band at 1726  $\text{cm}^{-1}$  in the R6G-CLCMs  
 164 spectrum arises from overlapping contributions of the CLC matrix, the PMMA shell, and R6G,  
 165 reflecting their coexistence within a physically encapsulated rather than chemically  
 166 crosslinked structure. Collectively, these characteristic absorption features verify that the  
 167 functional groups of CLC and R6G are retained, MMA is successfully polymerised into PMMA,  
 168 and the resulting R6G-CLCMs form a stable, physically assembled multi-component  
 169 microcapsule architecture.

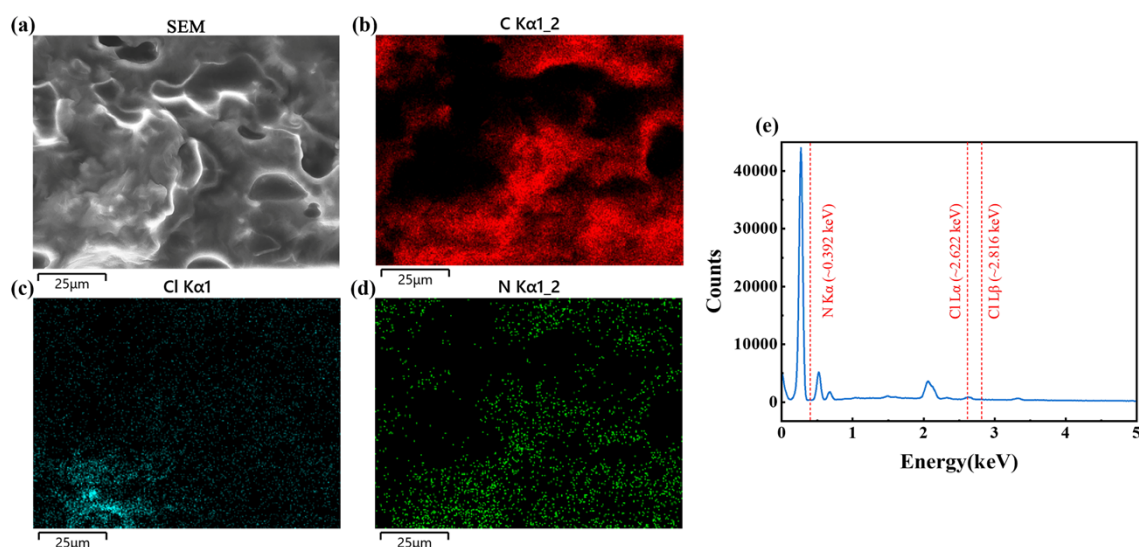

170

171 **Figure S5.** Energy-dispersive X-ray spectroscopy (EDS) analysis of the R6G-CLCMs/PVA  
 172 composite film. (a) SEM image of R6G-CLCMs embedded in PVA matrix after electron beam  
 173 bombardment Elemental mapping of (b) C, (c) Cl, and (d) N; (e) EDS spectrum with elemental  
 174 peaks.

175 SEM image showing the R6G-CLCMs embedded in the PVA matrix after electron beam  
 176 bombardment; local expansion and microcapsule rupture expose the internal regions,  
 177 providing accessible windows for elemental analysis (a). Elemental mapping images of C, Cl,  
 178 and N, respectively (b–d). The Cl element (c) shows a homogeneous distribution with localized  
 179 enrichment, whilst the N element (d) appears discretely distributed, both indicating  
 180 association with the R6G dye. (e) The EDS spectrum confirms the presence of key elements  
 181 and their characteristic energy peaks: signals at 0.392 keV, 2.622 keV, and 2.816 keV  
 182 correspond to N K $\alpha$ , Cl L $\alpha$ , and Cl L $\beta$ , respectively, demonstrating the coexistence of N and Cl  
 183 in the sample. Since the PVA matrix, PMMA shell, and CLC core contain neither nitrogen nor  
 184 chlorine, these signals can be definitively attributed to the diethylamino group and the  
 185 counter chloride ion of the R6G dye molecules. Combined observations from the SEM  
 186 structural damage image, elemental distribution maps, and the EDS spectrum collectively  
 187 confirm that R6G is successfully incorporated within the microcapsules and remains stably  
 188 embedded in the PVA composite film.

189

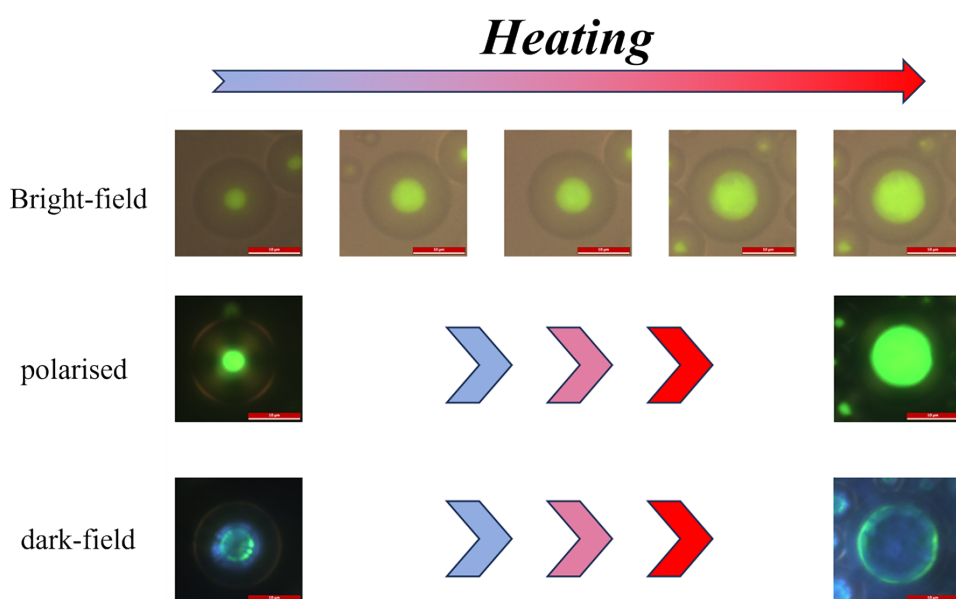

190

191 Figure S6. In optical microscopy images of a single R6G-CLCM under bright-field, polarised,  
 192 and dark-field modes during mechanical compression. (Scale bar: 10  $\mu\text{m}$ )

193 To further validate the structural stability and supporting capability of the microcapsules, an  
 194 aqueous dispersion of R6G-CLCMs was drop-cast onto a glass slide and covered with a  
 195 coverslip. The assembly was then placed on a heating stage maintained at 45  $^{\circ}\text{C}$  to control the  
 196 slow evaporation of water, allowing real-time observation of structural changes in the same  
 197 microcapsule during drying. In the bright-field mode, a central reflective bright spot within the  
 198 microcapsule gradually intensified and expanded as the water evaporated. This phenomenon  
 199 is attributed to the compressive force exerted by the coverslip during drying, which caused  
 200 the initially spherical microcapsule to deform progressively into an ellipsoidal shape. This  
 201 deformation led the liquid crystal core in the central region to transition from its initial radial  
 202 alignment to an approximately planar alignment, resulting in enhanced light reflection and  
 203 significantly increased brightness in this area. The polarised images provide further evidence  
 204 for the evolution of the liquid crystal alignment. Initially, the R6G-CLCM displayed a  
 205 characteristic Maltese cross pattern, indicating that the liquid crystal molecules were well  
 206 aligned radially due to the anchoring effect of the polymer shell. As the drying progressed and  
 207 the microcapsule became increasingly flattened under compression, the Maltese cross feature  
 208 at the centre gradually weakened and eventually disappeared, whereas faint birefringent  
 209 textures remained discernible around the periphery. This observation suggests that the shell

210 continued to maintain effective anchoring of the peripheral liquid crystal orientation even as  
211 the core region transitioned to a more planar structure.

212 Under dark-field illumination, the R6G-CLCM initially exhibited a distinct central green bright  
213 ring accompanied by six symmetrically distributed radial streaks of light, indicating that the  
214 internal liquid crystal molecules were in a well-ordered radial configuration, generating strong  
215 scattering and constructive interference effects. As water evaporation continued and the  
216 coverslip-induced compression increased, the microcapsule shape gradually evolved from a  
217 sphere to an ellipsoid, and the liquid crystal alignment underwent localized rearrangement.  
218 Consequently, the central bright ring became brighter and more diffuse, whilst the radial  
219 streaks progressively blurred, reflecting the gradual transition of the liquid crystal molecules  
220 from a radial to a more planar arrangement in the compressed state.

221 In summary, the in optical microscopy results clearly demonstrate that the R6G-CLCM  
222 microcapsules possess moderate flexibility under external compression. This mechanical  
223 deformation not only confirms the integrity and resilience of the capsule structure but also  
224 leads to a localized increase in the visual reflectance due to the reorganization of the liquid  
225 crystal core.

226

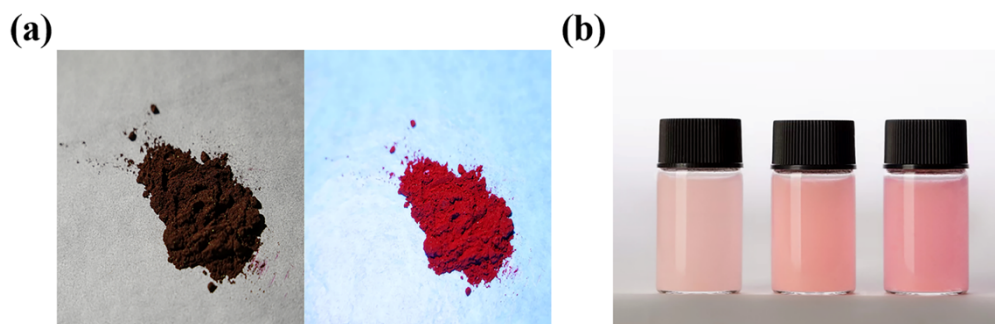

227

228 **Figure S7.** Photographs of R6G and R6G-CLCMs aqueous dispersions. (a) R6G under daylight  
229 (left) and under 360 nm UV light irradiation (right); (b) aqueous dispersions of R6G-CLCMs  
230 prepared with different R6G concentrations (0.05wt%, 0.1wt%, and 0.2wt%).

231



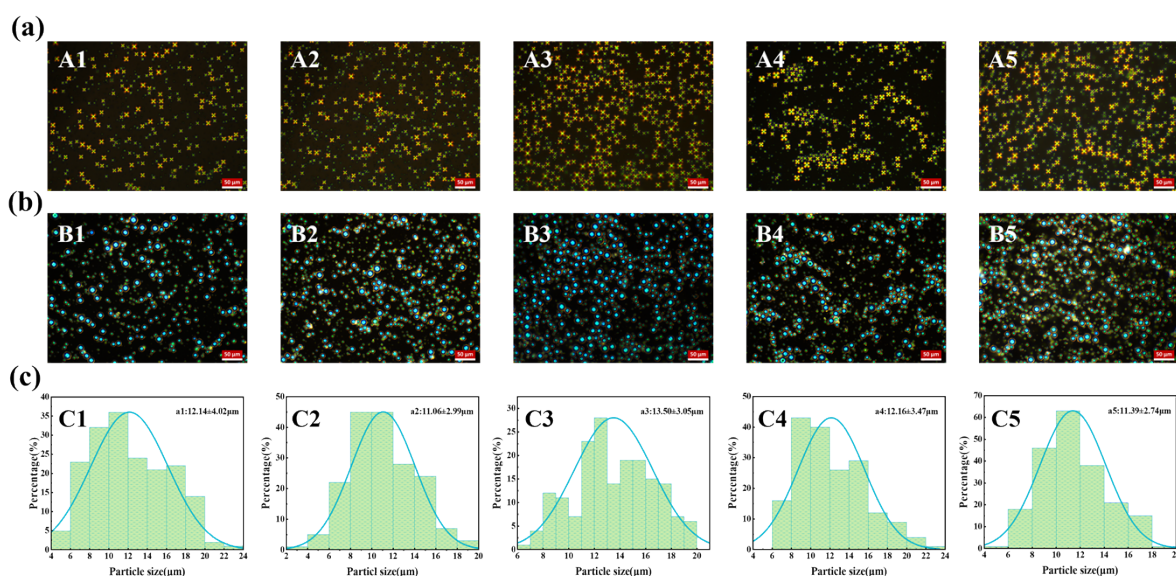

232

233 **Figure S8.** Polarised images (a), dark-field images (b), and particle size distribution (c) of R6G-  
 234 CLCMs prepared with different R6G doping concentrations (0.05wt%, 0.1wt%, 0.15wt%,  
 235 0.2wt%, and 0.25wt%).(Scale bar: 50 μm)

236 In the polarised images (A1–A5), all R6G-CLCMs exhibit bright and well-defined Maltese cross  
 237 patterns, indicating excellent radial alignment of the liquid crystal molecules within the  
 238 microcapsules. The corresponding dark-field images (B1–B5) show each R6G-CLCM as a bright  
 239 green dot further confirming the well-defined radial molecular orientation.

240 Panel (c) shows the particle size distribution calculated from over 180 sampling points per  
 241 concentration. The results demonstrate that the average microcapsule diameter remains  
 242 consistent at approximately 12 μm, irrespective of the R6G concentration. Minor deviations  
 243 observed in the distribution are likely attributable to manual measurement variability and  
 244 instrument error. Overall, the polarised and dark-field observations, combined with the size  
 245 distribution analysis, confirm that the R6G-CLCMs maintain stable morphology and uniform  
 246 radial alignment across varying dye concentrations.

247

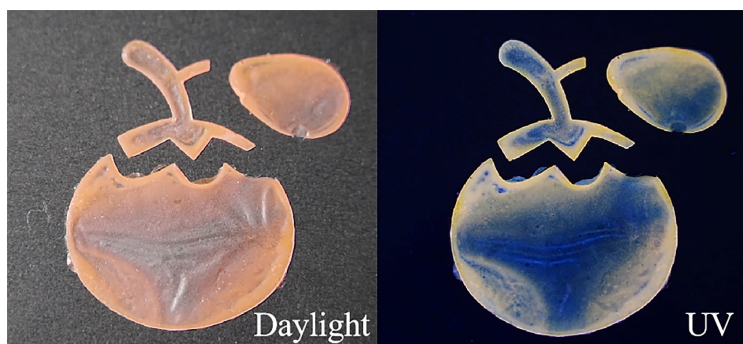

**Figure S9.** Optical images of a mould-cast “orange” patterned R6G-CLCMs film under Daylight (left) and UV illumination (right), illustrating the impact of the coffee-ring effect.

During natural drying, the solvent evaporation causes radial outward flow, transporting microcapsules and dye molecules toward the edge of the mould. As a result, more R6G-CLCMs accumulate along the perimeter, forming a distinct coffee-ring pattern. This leads to a noticeable colour and fluorescence intensity gradient: the film edge appears darker and more fluorescent under UV light, whilst the central region is relatively uniform but less intense. The coffee-ring-induced non-uniform distribution adversely affects the homogeneity of structural colour, dye absorption, and fluorescence, underscoring the necessity for optimised ink formulations and drying control to suppress this effect in practical patterning applications.



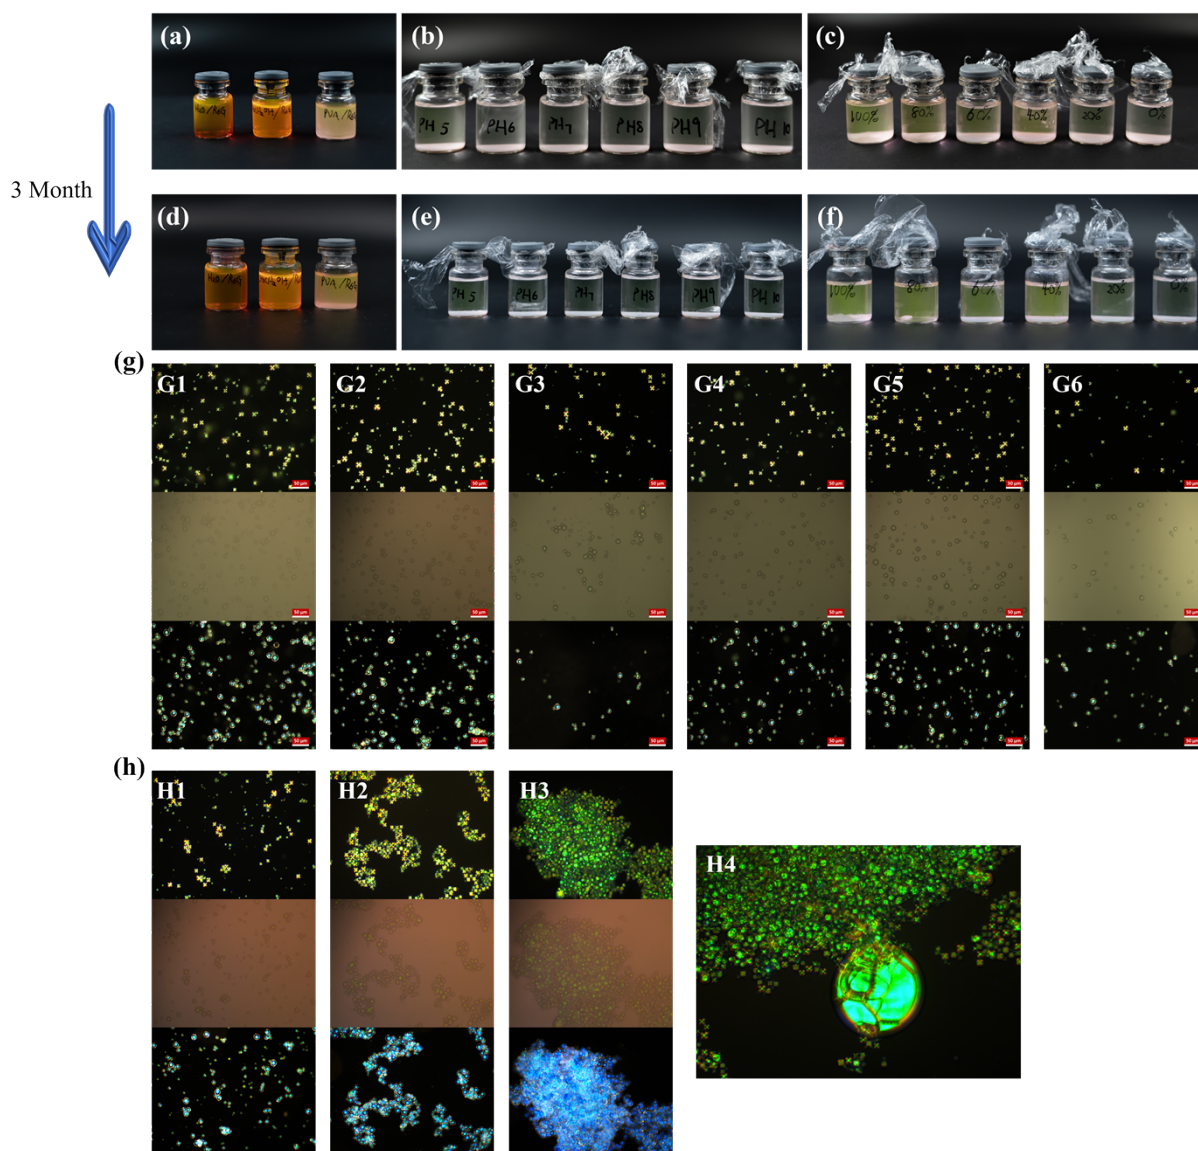

260

261 **Figure S10.** Environmental compatibility tests of R6G and R6G-CLCMs. (a) R6G dissolved in  
 262 water, anhydrous ethanol, and 15 wt% PVA solution. (b) R6G-CLCMs stored in buffer solutions  
 263 with different pH values (initial state). (c) R6G-CLCMs stored in ethanol solutions of varying  
 264 concentrations (initial state). (d) Appearance of R6G-CLCMs after 3 months in different  
 265 solvents. (e) Appearance after 3 months in different pH environments. (f) Appearance after 3  
 266 months in ethanol solutions of varying concentrations. (g) Optical microscopy of R6G-CLCMs  
 267 under various pH conditions (G1–G6: polarised, bright-field, dark-field). (h) Optical microscopy  
 268 under various ethanol concentrations. (Scale bar: 50  $\mu\text{m}$ )

269 R6G was dissolved in water, anhydrous ethanol, and a PVA solution to observe its colour  
 270 appearance. As shown in Figure S10a, the dye displayed distinct colours in these different  
 271 solvents. The resulting R6G-CLCMs were stored in solutions with different pH values (5 to 10)

272 for stability testing. Initially, the sample at pH=3 exhibited a slightly yellow-green, while other  
273 pH conditions showed negligible colour change (Figure S10b). The microcapsules were also  
274 immersed in ethanol solutions with concentrations ranging from 0vol% to 100vol% (Figure  
275 S10c. Upon contact with ethanol, a yellow-green colour emerged and intensified with  
276 increasing ethanol concentration, likely due to dissolution of free R6G from the capsule  
277 surface. After three months of storage, no visible dye precipitation was observed in any  
278 solvent, indicating good compatibility of R6G with the microcapsule system (Figure S10d).  
279 Under neutral pH conditions, the R6G-CLCMs remained visually unchanged, while acidic or  
280 alkaline environments induced a slight yellow-green hue (Figure S10e). At ethanol  
281 concentrations exceeding 80vol%, aggregation and partial capsule damage were observed  
282 (Figure S10f). To further investigate the capsule integrity, samples from the different pH  
283 conditions were examined by optical microscope (Figure S10g). Images G1–G6 show the  
284 polarised, bright-field, and dark-field views, respectively. In polarised mode, R6G-CLCMs  
285 consistently displayed clear and uniform Maltese cross textures, indicating well-maintained  
286 radial alignment. In bright-field mode, each microcapsule appeared as a distinct, well-oriented  
287 green dot, and in dark-field mode, strong internal reflection was still evident. These results  
288 confirm that the optical properties of the microcapsules remained stable under various pH  
289 conditions.

290 Additionally, samples stored in varying concentrations of anhydrous ethanol were also  
291 analysed. At ethanol concentrations below 60vol% (H1–H3), the R6G-CLCMs maintained good  
292 optical performance under polarised, bright-field, and dark-field observations, although  
293 aggregation increased. As the ethanol concentration increased, significant damage and  
294 rupture occurred at 80vol% (H4), leading to leakage of the liquid crystal core. Furthermore, a  
295 few minutes later, even the samples at lower concentrations (H1–H3) exhibited similar  
296 rupture behaviour as H4. In contrast, the microcapsules stored in different pH conditions  
297 remained relatively stable. Therefore, it can be concluded that high-concentration anhydrous  
298 ethanol negatively affects the mechanical integrity of R6G-CLCMs, causing embrittlement of  
299 the PMMA shell.

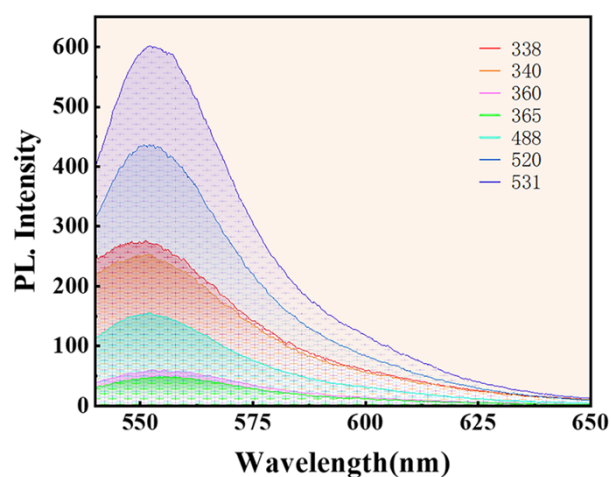

301

302 **Figure S11.** Different excitation wavelengths were employed to investigate the visible-region  
 303 emission characteristics of the R6G-CLCMs.

304 Under excitation at 338 nm and 340 nm, the fluorescence intensity was relatively strong, with  
 305 the highest emission peak observed at 531 nm and a secondary peak at 520 nm. Emission  
 306 intensities at other excitation wavelengths were comparatively lower. In this study, 531 nm  
 307 excitation was selected for analyzing the spectral properties of dye-doped liquid crystals and  
 308 microcapsule-based films; 360 nm excitation was used for photographing real film samples;  
 309 and 520 nm excitation was chosen for CPL measurements.

310

(a)

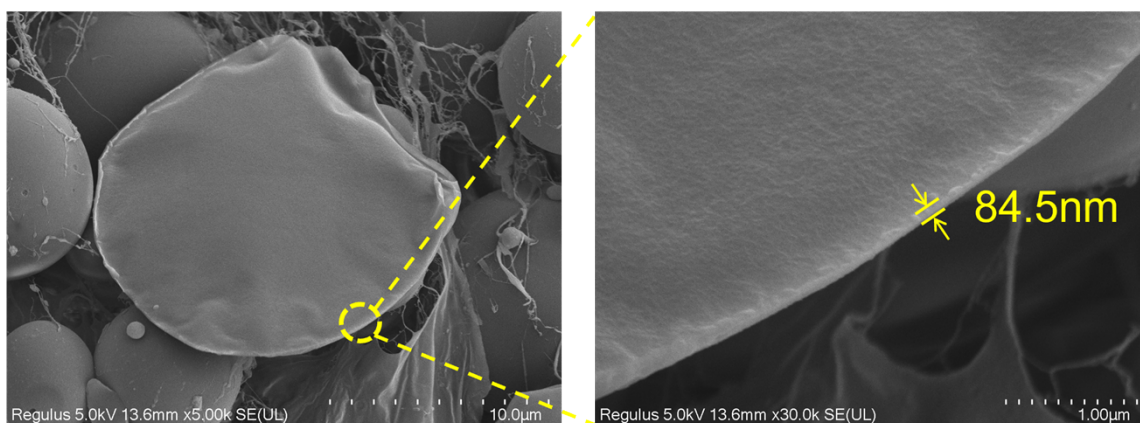

(b)

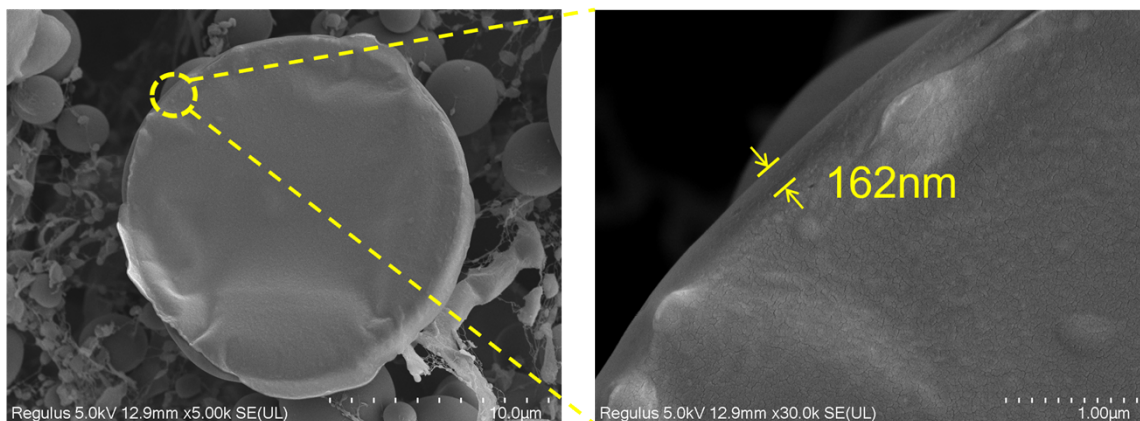

311

312 **Figure S12.** Cryo-SEM images of R6G-CLCMs synthesised with different MMA contents. (a)  
313 Microcapsules prepared with 0.8 g MMA; the enlarged image on the right corresponds to the  
314 circled region in (a), revealing a PMMA shell thickness of approximately 84.5 nm. (b)  
315 Microcapsules prepared with 1.2 g MMA; the enlarged image on the right corresponds to the  
316 circled region in (b), showing an increased shell thickness of approximately 162 nm.

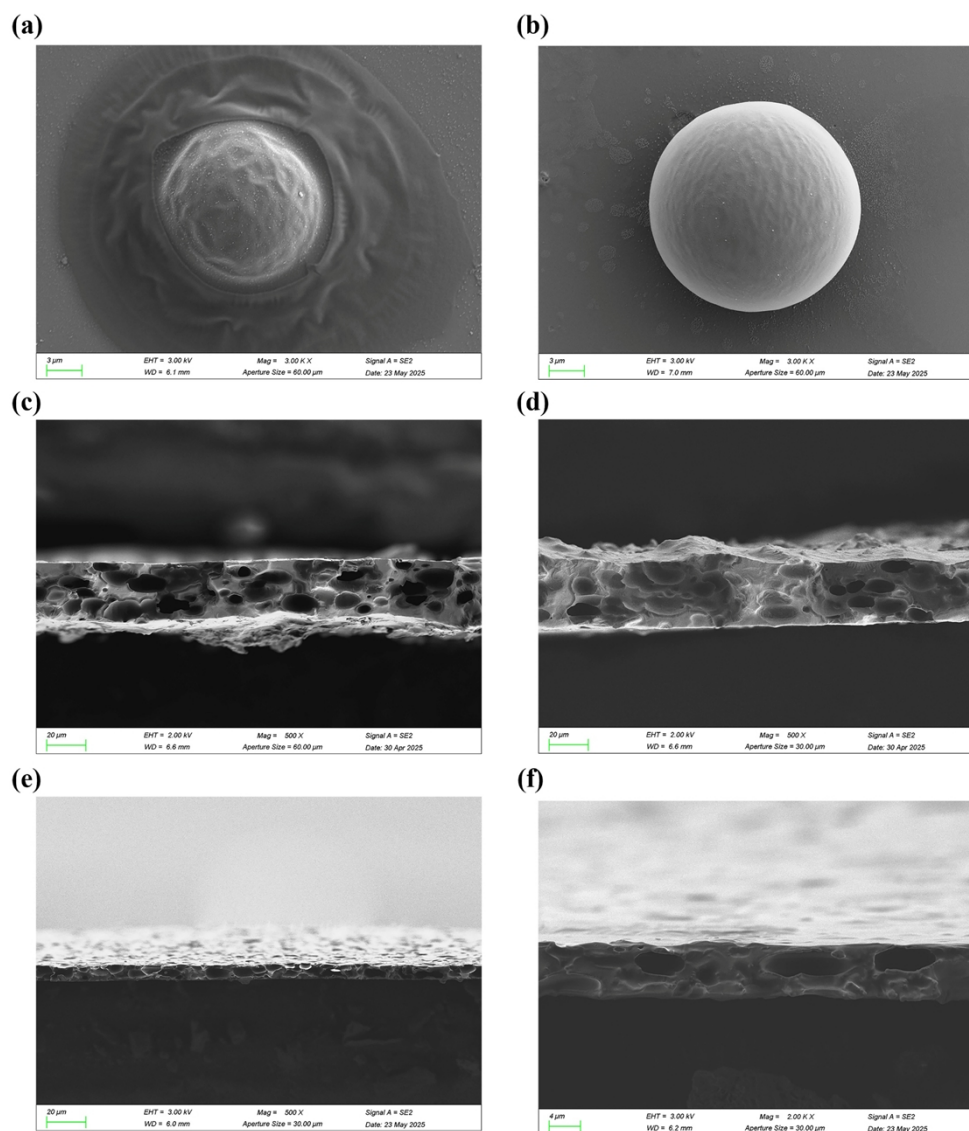

317

318 **Figure S13.** Morphology of individual R6G-CLCMs microcapsules and cross-sectional  
 319 structures of films prepared under different fabrication conditions. (a) R6G-CLCMs  
 320 synthesised with 0.8 g MMA (thin-shell); (b) R6G-CLCMs synthesised with 1.2 g MMA (thick-  
 321 shell); (c) Cross-section of 55 µm mould-cast film (liquid nitrogen fractured); (d) Cross-section  
 322 of 85 µm mould-cast film (liquid nitrogen fractured); (e) Cross-section of blade-coated film  
 323 (liquid nitrogen fractured); (f) Cross-section of blade-coated film (mechanical blade cut).

324 SEM image of microcapsules synthesised with 0.8 g MMA as the shell monomer shows  
 325 pronounced surface wrinkles and shape shrinkage, indicating insufficient structural stability  
 326 (a). In contrast, microcapsules prepared with 1.2 g MMA exhibit a more uniform spherical  
 327 shape with a smooth and intact surface (b). Due to the absence of a crosslinker and the use of  
 328 free-radical polymerisation, the PMMA shells adopt a linear polymer structure without  
 329 covalent crosslinking support, resulting in poor self-supporting capability at lower MMA



330 content. Cross-sectional SEM images of films prepared by mould casting with thicknesses of  
 331 55  $\mu\text{m}$  (c) and 85  $\mu\text{m}$  (d) after liquid nitrogen fracturing reveal densely packed microcapsules  
 332 within the film matrix. Some capsules are slightly deformed due to compression but largely  
 333 retain their spherical geometry, with no obvious rupture caused by the pressure from adjacent  
 334 layers. The intact internal structure indicates good compressive resistance of the material. By  
 335 comparison, films fabricated by blade coating exhibit higher surface smoothness and  
 336 uniformity. Under liquid nitrogen fracturing conditions (e), partial capsule rupture can be  
 337 observed, but the original spherical morphology is still recognizable, demonstrating adequate  
 338 self-support. Under mechanical cutting using an ordinary blade (f), some microcapsules are  
 339 broken, causing localized leakage, whilst others maintain their elliptical shape due to  
 340 compressive deformation, further confirming the morphological integrity of the capsules  
 341 within the film.

342

343

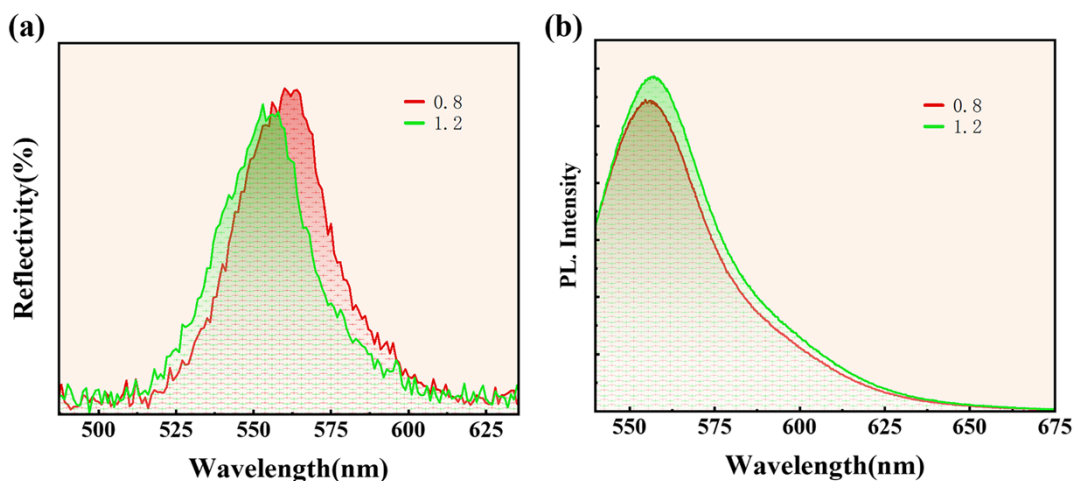

344

345 **Figure S14.** Reflectance and fluorescence properties of R6G-CLCMs with different shell  
 346 thicknesses. The microcapsules were prepared with 0.8 g MMA (thin shell) and 1.2 g MMA  
 347 (thick shell) under otherwise identical conditions. (a) Reflectance spectra. (b) Fluorescence  
 348 emission spectr.

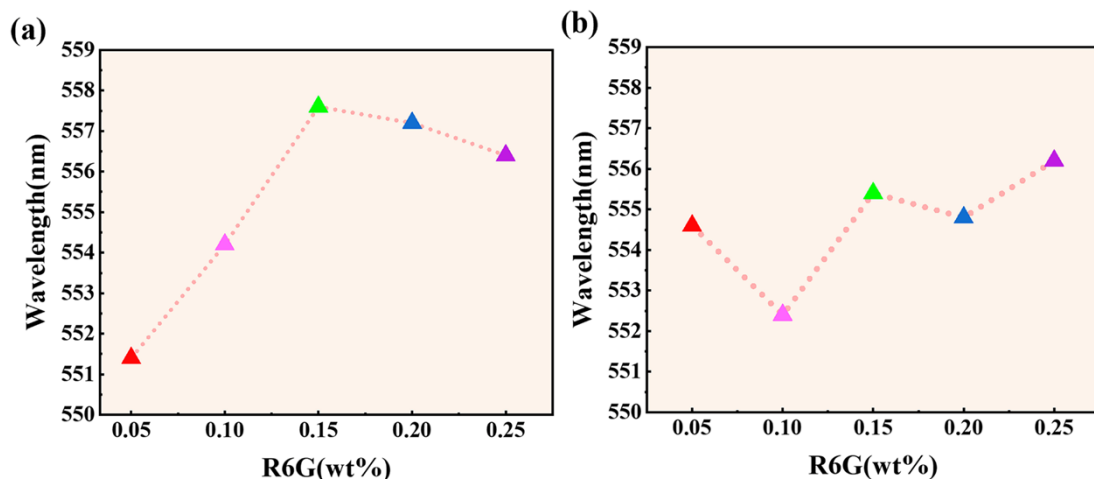

**Figure S15.** Fluorescence peak position trends of R6G-CLCMs at various dye concentrations. (a) Thick-shell microcapsules (1.2 g MMA): Fluorescence emission peak trend. (b) Thin-shell microcapsules (0.8 g MMA): Fluorescence emission peak trend.

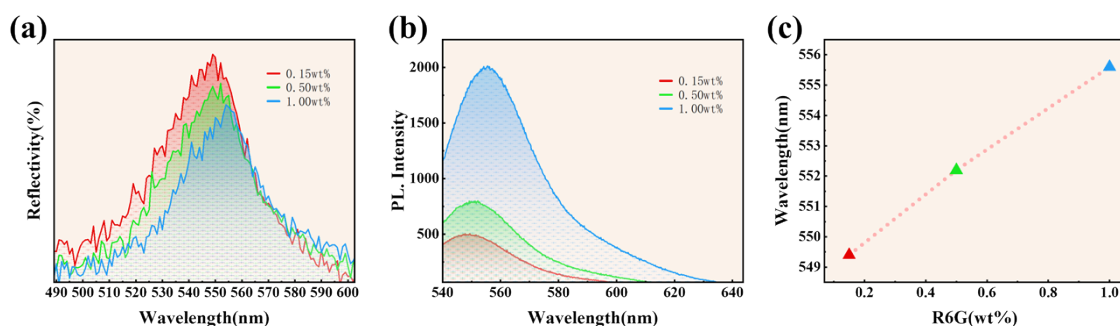

**Figure S16.** Optical properties of R6G-CLCMs films with higher R6G doping concentrations prepared by blade coating. (a) Reflectance spectra (b) fluorescence emission spectra. (c) Fluorescence emission peak wavelengths.

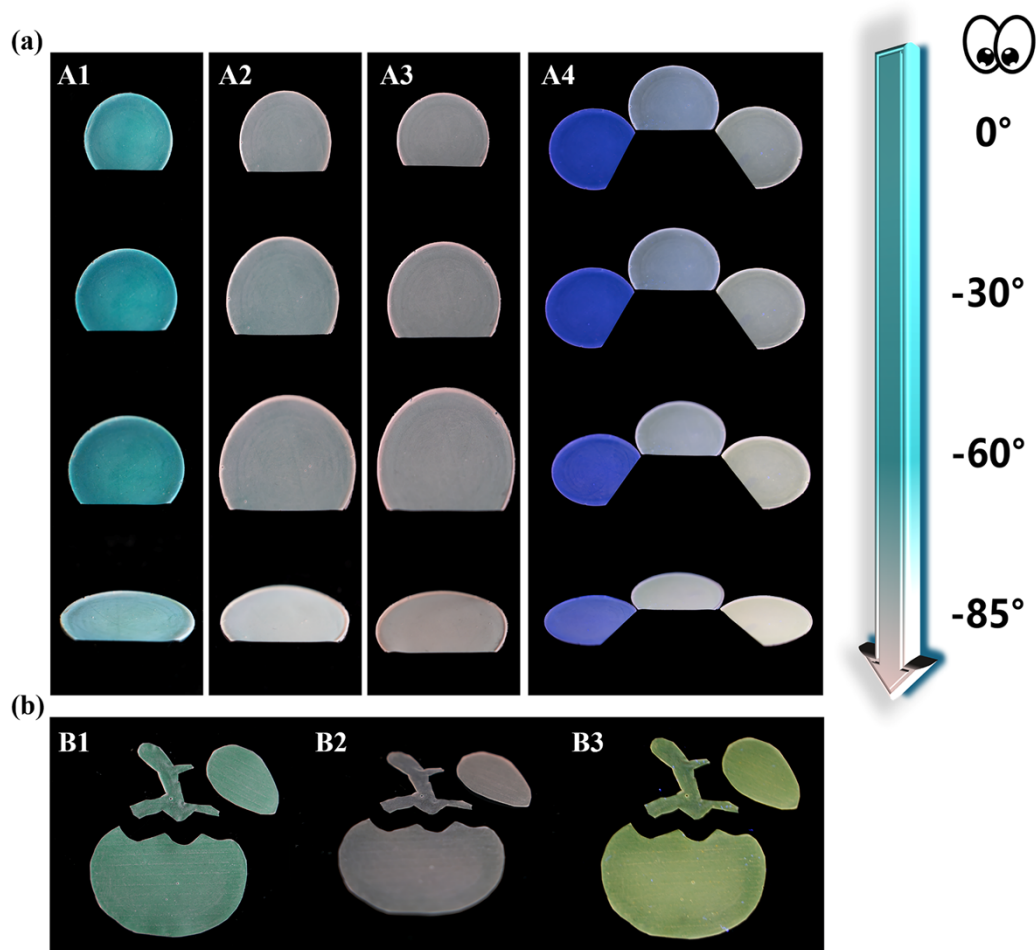

361

362 **Figure S17.** Mould-cast films fabricated with different concentrations of R6G-CLCMs. (a)  
 363 Angle-dependent optical and fluorescence responses of films containing 0.05 wt% (A1),  
 364 0.15 wt% (A2), and 0.25 wt% (A3) R6G-CLCMs. A4 shows the combined fluorescence images  
 365 of A1–A3 under UV light at different viewing angles. (b) Structural colour (B1), dye absorption  
 366 (B2), and fluorescence emission (B3) of a film prepared using a higher PVA dilution ratio  
 367 (1:2.5).

368 For samples A1–A3, R6G-CLCMs with concentrations of 0.05 wt% (A1), 0.15 wt% (A2), and 0.25  
 369 wt% (A3) were each mixed with a 15% PVA solution at a weight ratio of 1:1.5. The mixtures  
 370 were slowly injected into custom moulds using a syringe and dried naturally at room  
 371 temperature to form the films shown. The optical appearance of these films was observed  
 372 over a viewing angle range from 0° to –85°. As the viewing angle decreased, the microcapsule  
 373 films gradually appeared pinkish. This is because at 0°, the structural colour of the liquid  
 374 crystals is relatively strong and dominates the appearance; however, as the angle decreases,  
 375 the structural reflection is increasingly masked by the inherent colour of the R6G dye, leading



376 to a more pronounced display of the dye colour. Consequently, fluorescence is enhanced at  
377 these lower angles, which is corroborated by the fluorescence images under varied angles  
378 shown in A4.

379 Due to the use of 1.2 g MMA to prepare a thicker PMMA shell, the R6G-CLCMs themselves  
380 exhibit a slightly pinkish hue. To reduce this effect and better demonstrate the distinct optical  
381 features, another film was prepared by mixing R6G-CLCMs (0.15wt%) with a 15wt% PVA  
382 solution at a weight ratio of 1:2.5 and thoroughly homogenised. The resulting film (b) further  
383 highlights three key aspects: the clear cholesteric liquid crystal structural colour (B1), the  
384 intrinsic pinkish colour of the R6G-loaded material (B2), and the yellow-green fluorescence of  
385 the R6G-CLCMs under UV light (B3).

386

387

388

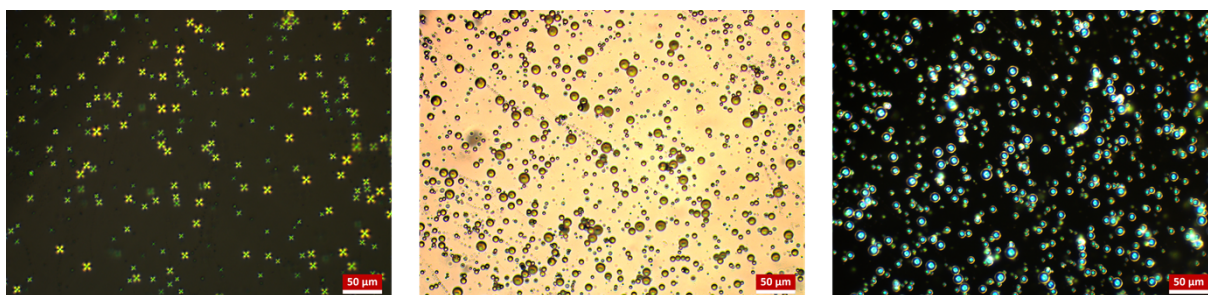

389 **Figure S18.** Polarized optical microscopy (POM) images of dye-free cholesteric liquid crystal  
390 microcapsules (CLCMs) observed under crossed-polarised, bright-field, and dark-field  
391 conditions. (Scale bar: 50 µm)

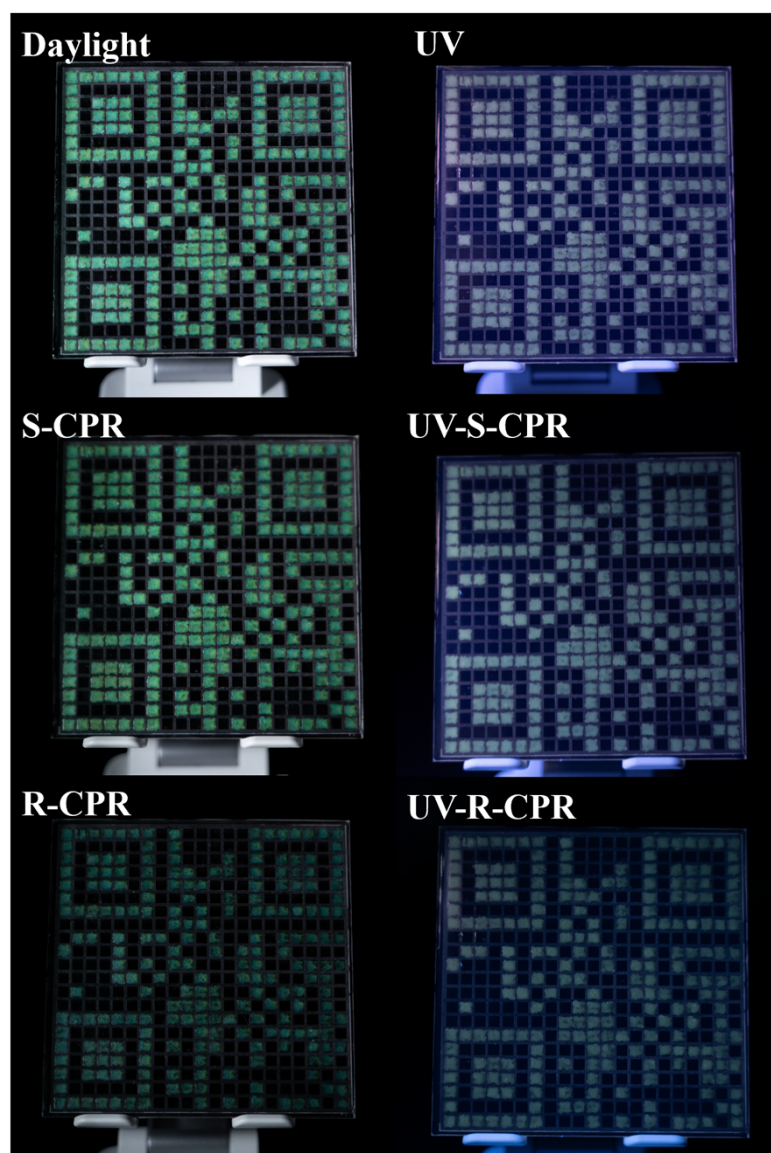

392

393 **Figure S19.** Polarised optical images of a single-ink R6G-CLCMs QR code on a black substrate  
 394 under daylight and UV illumination.

395

396

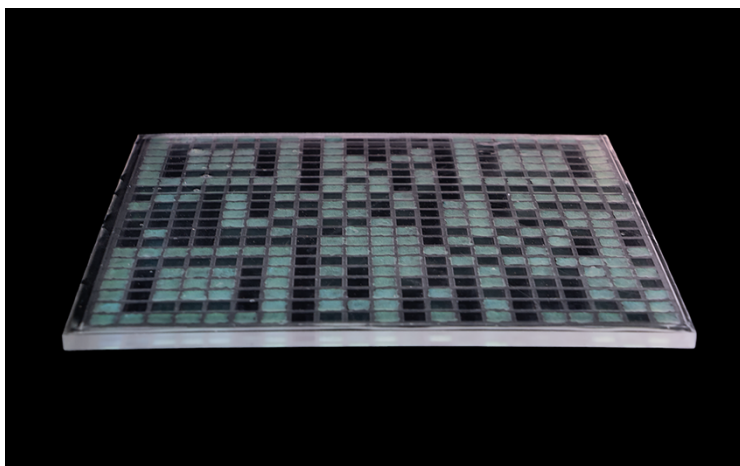

397

398 **Figure S20.** Angle-dependent optical images of a single-ink R6G-CLCMs QR code on a black  
399 substrate, showing a colour shift from green structural colouration to pink dye absorption  
400 with changing viewing angle.
